# Supplementary material for: Comparative Metabolomics Profiling of Polyphenols, Nutrients and Antioxidant Activities of Two Red Onion (Allium cepa L.) Cultivars
Source: Plants (Basel). 2020 Aug 21;9(9):1077. doi: 10.3390/plants9091077 (PMC7569911; doi:10.3390/plants9091077)
Supplement: Supplementary file 1 [file plants-09-01077-s001.xlsx]

## Sheet: Phytochemical metaboanalyst-Ind
	Pyruvic acid	Brix	Glucose	Fructose	Sucrose	Cyanidin-3-glucoside	Cyanidin-3-laminaribioside	Delphinidin-3,5-diglucoside	Cyanidin-3,6-malonoylglucoside	Cyanidin-3,6-malonoyllaminaribioside	Peonidin-3-malonoylglucoside	Cyanidin-3-(malonoyl)(acetoyl)-glucoside	Quercetin-3,4-diglucoside	Quercetin	Quercetin-3-glucoside	Quercetin-4-glucoside	Isorhamnetin-4-glucoside	Isorhamnetin-3,4-diglucoside	Quercetin-7,4-diglucoside	Quercetin-3,7,4-triglucoside	ABTS	DPPH	Amylase	Total Phenolic Content	Nitrogen	Protein	Phosphorous	Potassium	Calcium	Magnesium	Sodium	Zinc	Iron	Copper	Manganese	Sulfur	Boron
Pyruvic acid	1	-0.295087	0.592872	0.825594	-0.731073	0.324866	-0.831517	-0.38634	-0.375059	-0.744547	-0.697844	0.479824	-0.221417	-0.270094	0.226425	-0.509787	-0.559136	0.126724	-0.29813	-0.181691	0.705346	0.0312466	0.826147	-0.428159	-0.536061	-0.540463	0.43932	0.743262	-0.674417	0.798969	-0.858645	-0.62626	0.0949917	-0.850116	0.845526	0.39032	-0.728724
Brix		1	-0.0285842	-0.233012	0.437442	-0.3538	0.232957	-0.138986	-0.324875	-0.00446588	-0.206329	-0.339505	-0.112435	-0.497812	-0.583456	-0.316267	-0.199736	-0.47391	-0.233279	-0.464386	-0.727966	-0.331768	-0.180933	0.297499	0.138737	0.136882	-0.243083	-0.316503	0.0961	-0.49567	0.195468	0.4213	0.0274047	0.28752	-0.395393	-0.100308	0.240541
Glucose			1	0.924178	-0.805569	0.633062	-0.363718	0.0553601	-0.0769351	-0.369811	-0.47161	0.394783	-0.462612	0.13531	0.340084	-0.420214	-0.547913	0.142368	-0.109454	-0.0225336	0.364188	0.249819	0.617177	-0.0574361	-0.466931	-0.464888	-0.0667303	0.0785372	-0.416345	0.563631	-0.842377	-0.408155	0.516841	-0.839885	0.807496	-0.292442	-0.609907
Fructose				1	-0.869607	0.671356	-0.558473	-0.0185235	-0.100484	-0.507257	-0.525437	0.531841	-0.388883	0.0851097	0.382428	-0.412782	-0.544455	0.238908	-0.0871066	0.0269435	0.615652	0.301454	0.765111	-0.185093	-0.615374	-0.61568	0.154286	0.399288	-0.567698	0.75673	-0.911788	-0.530186	0.360543	-0.956322	0.924223	-0.022322	-0.779551
Sucrose					1	-0.479275	0.598242	0.146463	0.121731	0.512118	0.421929	-0.708721	0.511292	-0.0389811	-0.270215	0.538553	0.675485	-0.0262214	0.292399	0.14229	-0.695512	-0.0820365	-0.704608	0.459678	0.562479	0.561201	-0.251792	-0.269421	0.660738	-0.800959	0.885892	0.597023	-0.30199	0.877071	-0.834332	0.290111	0.750016
Cyanidin-3-glucoside						1	0.126283	0.698816	0.593336	0.199659	0.179372	0.295535	-0.284682	0.692664	0.651813	0.213588	0.017358	0.426449	0.492362	0.579168	0.378977	0.759797	0.342333	0.327666	-0.372804	-0.367646	-0.300766	0.0462674	0.0295601	0.568542	-0.379175	-0.213382	0.507485	-0.56475	0.640625	-0.0623886	-0.402775
Cyanidin-3-laminaribioside							1	0.778324	0.728782	0.958103	0.792484	-0.391037	-0.0851121	0.518064	-0.0284725	0.56229	0.586872	-0.0688853	0.602337	0.414138	-0.586093	0.30483	-0.707258	0.492382	0.350113	0.357812	-0.53395	-0.633167	0.702503	-0.525358	0.774564	0.684501	0.114845	0.705811	-0.606207	-0.265167	0.601309
Delphinidin-3,5-diglucoside								1	0.942809	0.817557	0.754711	-0.0239724	-0.202834	0.80482	0.377794	0.57654	0.485557	0.254315	0.770743	0.691056	-0.10398	0.75275	-0.257439	0.511795	0.00635241	0.0140054	-0.511014	-0.3656	0.509574	-0.00233117	0.370155	0.373175	0.328643	0.167776	-0.0522273	-0.18897	0.142577
Cyanidin-3,6-malonoylglucoside									1	0.82374	0.854991	0.0984498	-0.23415	0.758684	0.333957	0.56619	0.525193	0.222881	0.738899	0.655479	0.035188	0.753176	-0.202916	0.300251	0.0382774	0.0453928	-0.38398	-0.298748	0.477533	0.052985	0.439547	0.396687	0.234295	0.225787	-0.0878054	-0.172618	0.125092
Cyanidin-3,6-malonoyllaminaribioside										1	0.836721	-0.309395	-0.0734168	0.646355	0.126673	0.662552	0.683947	0.0702366	0.72384	0.569323	-0.363359	0.414308	-0.664028	0.353033	0.334117	0.340749	-0.424805	-0.482556	0.657239	-0.432568	0.748963	0.589069	0.0873479	0.666336	-0.499753	-0.194188	0.555884
Peonidin-3-malonoylglucoside											1	-0.00897317	0.00689981	0.584131	0.086583	0.611808	0.602445	0.0636937	0.559188	0.48729	-0.190634	0.503546	-0.430718	0.344471	0.295679	0.30028	-0.407485	-0.495416	0.59375	-0.264538	0.740473	0.483788	0.0445191	0.54659	-0.467703	-0.287655	0.370348
Cyanidin-3-(malonoyl)(acetoyl)-glucoside												1	-0.498922	-0.0719107	-0.129837	-0.458473	-0.508461	-0.0719131	-0.12341	-0.126848	0.710925	0.245327	0.639751	-0.53605	-0.664688	-0.668912	0.440013	0.313043	-0.731977	0.583105	-0.453061	-0.225973	-0.0916816	-0.605502	0.463116	-0.334967	-0.840223
Quercetin-3,4-diglucoside													1	0.120832	0.255595	0.625094	0.596401	0.611306	0.189945	0.377737	-0.0789265	0.0272046	-0.31688	0.380784	0.346962	0.339616	0.0240443	0.141129	0.307837	-0.487996	0.297617	-0.128701	-0.343926	0.246537	-0.264268	0.397157	0.319928
Quercetin														1	0.748667	0.748664	0.569408	0.60281	0.757285	0.888813	0.173058	0.708065	-0.260841	0.42417	0.100626	0.105519	-0.404034	-0.240159	0.435625	0.0200643	0.158515	-0.0540714	0.329382	0.00946552	0.159424	-0.197861	0.146832
Quercetin-3-glucoside															1	0.51857	0.329243	0.663083	0.38792	0.686254	0.391579	0.554472	0.176626	0.33048	0.225559	0.226265	-0.37273	0.0720381	0.306575	0.344203	-0.285245	-0.575176	0.554346	-0.340585	0.596622	0.126439	0.0562024
Quercetin-4-glucoside																1	0.947459	0.689438	0.801017	0.876707	-0.0781822	0.543189	-0.551327	0.51176	0.360705	0.36081	-0.267096	-0.111419	0.643346	-0.440182	0.593366	0.19964	-0.0912311	0.446814	-0.300381	0.205048	0.465548
Isorhamnetin-4-glucoside																	1	0.599239	0.781241	0.764998	-0.149729	0.474078	-0.578167	0.379912	0.410984	0.410016	-0.164346	-0.0625957	0.648676	-0.566499	0.724982	0.391595	-0.221231	0.599851	-0.448997	0.293414	0.527077
Isorhamnetin-3,4-diglucoside																		1	0.647928	0.823259	0.445428	0.647722	0.0272326	0.231454	-0.116977	-0.122085	0.112893	0.355067	0.0782124	-0.0653641	-0.065862	-0.19137	-0.126958	-0.243003	0.284246	0.284845	-0.17638
Quercetin-7,4-diglucoside																			1	0.912196	0.116926	0.7518	-0.370556	0.290014	-0.0901771	-0.0897514	-0.0499879	0.0886696	0.32023	-0.25955	0.432305	0.374669	-0.142088	0.230845	-0.119737	0.161955	0.0879228
Quercetin-3,7,4-triglucoside																				1	0.27165	0.774192	-0.258764	0.367202	0.0132803	0.0126948	-0.136619	0.100441	0.343293	-0.11881	0.248781	0.0225425	0.0132823	0.0537275	0.0936714	0.14887	0.0781126
ABTS																					1	0.365535	0.622225	-0.56174	-0.500945	-0.508035	0.563633	0.703008	-0.631073	0.62769	-0.553827	-0.555709	-0.113521	-0.665949	0.70084	0.13975	-0.716485
DPPH																						1	0.232883	0.341652	-0.15531	-0.156591	-0.233075	0.072952	0.214825	0.176553	0.0644442	0.0863382	0.235594	-0.230254	0.318117	0.019854	-0.257445
Amylase																							1	-0.287082	-0.361197	-0.366972	0.153839	0.434391	-0.524257	0.764057	-0.754449	-0.531524	0.32409	-0.829858	0.809969	0.0746054	-0.724012
Total Phenolic Content																								1	0.370999	0.375056	-0.791966	-0.517592	0.71868	-0.269255	0.296993	0.126731	0.41086	0.186673	-0.168997	-0.00742455	0.420406
Nitrogen																									1	0.999831	-0.623616	-0.502651	0.767203	-0.425627	0.476953	-0.0274543	0.388215	0.607965	-0.350254	-0.0178807	0.879702
Protein																										1	-0.630867	-0.512293	0.774455	-0.422449	0.478379	-0.0216396	0.393879	0.610411	-0.35266	-0.0218367	0.88409
Phosphorous																											1	0.769876	-0.78814	0.083712	-0.209419	-0.0248953	-0.797948	-0.205033	0.049471	0.304378	-0.55285
Potassium																												1	-0.624784	0.361793	-0.381451	-0.322136	-0.460879	-0.422441	0.426067	0.701292	-0.551112
Calcium																													1	-0.406752	0.641101	0.328763	0.383024	0.628771	-0.435999	0.0382753	0.8299
Magnesium																														1	-0.731295	-0.571817	0.401962	-0.771609	0.818542	0.103079	-0.608433
Sodium																															1	0.720424	-0.332838	0.9343	-0.887111	0.039831	0.683158
Zinc																																1	-0.381813	0.640273	-0.7515	-0.0535242	0.268982
Iron																																	1	-0.281284	0.498919	-0.302389	0.171955
Copper																																		1	-0.910169	0.0324317	0.833847
Manganese																																			1	0.0669857	-0.622008
Sulfur																																				1	0.0421417
Boron																																					1
